# Supplementary material for: Going Forward: Potential Impact of Protein-Based COVID-19 Vaccination Coverage on Population Outcomes and Costs in the United States
Source: MDPI journal article supplement (doi:10.3390/vaccines12010074), 2024-01-12
Supplement: s1 [file s1]

# **Going Forward: Potential Impact of Protein-based COVID-19 Vaccination Coverage, Population Outcomes, and Costs in the US**

Paret K, Beyhaghi H, Herring WL, Mauskopf J, Shane LG, Rousculp MD

**Supplemental Materials**

**Table S1.     Epidemiology Scenarios Based on Published Confirmed COVID-19 Cases by Month**

| Month and year     | Cumulative cases | Monthly cases | Scenario                 |              |                     |
|--------------------|------------------|---------------|--------------------------|--------------|---------------------|
|                    |                  |               | Most recent year of data | Post Omicron | 1 year post Omicron |
| Dec 2020           | 643,284          |               |                          |              |                     |
| Jan 2021           | 1,390,234        | 746,950       |                          |              |                     |
| Feb 2021           | 1,984,537        | 594,303       |                          |              |                     |
| Mar 2021           | 3,422,248        | 1,437,711     |                          |              |                     |
| Apr 2021           | 5,151,596        | 1,729,348     |                          |              |                     |
| May 2021           | 6,343,192        | 1,191,596     |                          |              |                     |
| Jun 2021           | 7,888,244        | 1,545,052     |                          |              |                     |
| Jul 2021           | 10,405,391       | 2,517,147     |                          |              |                     |
| Aug 2021           | 15,434,890       | 5,029,499     |                          |              |                     |
| Sep 2021           | 23,101,019       | 7,666,129     |                          |              |                     |
| Oct 2021           | 27,268,025       | 4,167,006     |                          |              |                     |
| Nov 2021           | 29,494,069       | 2,226,044     |                          |              |                     |
| Dec 2021           | 31,297,933       | 1,803,864     |                          | 1,803,864    | 1,803,864           |
| Jan 2022           | 32,716,870       | 1,418,937     |                          | 1,418,937    | 1,418,937           |
| Feb 2022           | 33,315,233       | 598,363       |                          | 598,363      | 598,363             |
| Mar 2022           | 33,971,503       | 656,270       |                          | 656,270      | 656,270             |
| Apr 2022           | 36,252,931       | 2,281,428     |                          | 2,281,428    | 2,281,428           |
| May 2022           | 40,560,724       | 4,307,793     | 4,307,793                | 4,307,793    | 4,307,793           |
| Jun 2022           | 44,642,805       | 4,082,081     | 4,082,081                | 4,082,081    | 4,082,081           |
| Jul 2022           | 46,723,945       | 2,081,140     | 2,081,140                | 2,081,140    | 2,081,140           |
| Aug 2022           | 50,312,506       | 3,588,561     | 3,588,561                | 3,588,561    | 3,588,561           |
| Sep 2022           | 63,354,105       | 13,041,599    | 13,041,599               | 13,041,599   | 13,041,599          |
| Oct 2022           | 77,432,340       | 14,078,235    | 14,078,235               | 14,078,235   | 14,078,235          |
| Nov 2022           | 79,727,921       | 2,295,581     | 2,295,581                | 2,295,581    | 2,295,581           |
| Dec 2022           | 80,541,713       | 813,792       | 813,792                  | 813,792      |                     |
| Jan 2023           | 82,263,031       | 1,721,318     | 1,721,318                | 1,721,318    |                     |
| Feb 2023           | 85,947,586       | 3,684,555     | 3,684,555                | 3,684,555    |                     |
| Mar 2023           | 89,048,044       | 3,100,458     | 3,100,458                | 3,100,458    |                     |
| Apr 2023           | 92,462,417       | 3,414,373     | 3,414,373                | 3,414,373    |                     |
| Cases per week     |                  | 698,551       | 449,037                  | 759,398      | 963,691             |
| Weekly probability |                  | 0.2154%       | 0.1384%                  | 0.2341%      | 0.2971%             |
| Annualized %       |                  | 10.61%        | 6.95%                    | 11.48%       | 14.34%              |

Note: Data presented in the table are based on monthly cumulative cases since the start of the pandemic

[1]. Weekly probability utilizes cases per week divided by the size of the US population.

**Table S2. Sensitivity Analysis Parameter Values**

| Input parameter                                          | Low     | Base case | High    | Notes                                                                                                            |
|----------------------------------------------------------|---------|-----------|---------|------------------------------------------------------------------------------------------------------------------|
| Weekly incidence                                         | 0.1384% | 0.2341%   | 0.2971% | Derived from [1] in Table S1                                                                                     |
| COVID-19 severity by age                                 |         |           |         |                                                                                                                  |
| Hospitalization, 12-17 years                             | 0.55%   | 0.68%     | 0.82%   | Assumption on uncertainty range (+/- 20%); Hospitalization probability reported is combined with and without ICU |
| Hospitalization, 18-64 years, low risk                   | 2.21%   | 2.77%     | 3.32%   |                                                                                                                  |
| Hospitalization, 18-64 years, high risk                  | 10.02%  | 12.52%    | 15.03%  |                                                                                                                  |
| Hospitalization, ≥ 65 years                              | 10.02%  | 12.52%    | 15.03%  |                                                                                                                  |
| COVID-19 mortality by age                                |         |           |         |                                                                                                                  |
| Hospitalization, 12-17 years                             | 0.37%   | 0.46%     | 0.56%   | Assumption on uncertainty range (+/- 20%); Hospitalization probability reported is combined with and without ICU |
| Hospitalization, 18-64 years, low risk                   | 1.78%   | 2.22%     | 2.67%   |                                                                                                                  |
| Hospitalization, 18-64 years, high risk                  | 4.45%   | 5.62%     | 6.75%   |                                                                                                                  |
| Hospitalization, ≥ 65 years                              | 4.45%   | 5.62%     | 6.75%   |                                                                                                                  |
| Probability of long COVID                                | 5.8%    | 7.2%      | 9.1%    | [2]                                                                                                              |
| Vaccine parameters (all updated COVID-19 vaccines)       |         |           |         |                                                                                                                  |
| Relative efficacy against infection                      | 50%     | 56%       | 62%     | Confidence intervals around mean for BA.4/BA.5 Bivalent mRNA vaccine [3]                                         |
| Relative efficacy against hospitalization                | 64%     | 73%       | 80%     |                                                                                                                  |
| Monthly waning rate of efficacy against infection        | 0.3%    | 12.8%     | 20.0%   | Derived from [4]                                                                                                 |
| Monthly waning rate of efficacy against hospitalization  | 0.9%    | 6.0%      | 13.9%   | Derived from [5]                                                                                                 |
| Vaccine coverage overall increase in eligible population | 2.5%    | 5.0%      | 7.5%    | Assumption                                                                                                       |

Note: Ranges provided for parameters utilized in sensitivity analyses and is not inclusive of all model parameters.

**Table S3. Detailed Scenario Analysis Results**

| Summary results                               | Cases avoided | Hospitalizations avoided | Incremental direct costs (\$MM) | Incremental QALYs gained | Incremental cost per QALY gained |
|-----------------------------------------------|---------------|--------------------------|---------------------------------|--------------------------|----------------------------------|
| <b>Base case</b>                              | 501,692       | 66,938                   | \$690.59                        | 42,785                   | \$16,141                         |
| <b>Uncertainty in COVID-19 epidemiology:</b>  |               |                          |                                 |                          |                                  |
| Decreased incidence                           | 306,325       | 40,533                   | \$1,190.08                      | 25,751                   | \$46,216                         |
| Increased incidence                           | 623,374       | 83,633                   | \$374.95                        | 53,558                   | \$7,001                          |
| <b>2023-2024 COVID-19 vaccine attributes:</b> |               |                          |                                 |                          |                                  |
| Increase in relative effectiveness            | 555,536       | 73,457                   | \$565.99                        | 47,059                   | \$12,027                         |
| Decrease in relative effectiveness            | 446,191       | 58,554                   | \$847.40                        | 37,482                   | \$22,608                         |
| Relative increase in durability of protection | 956,269       | 89,618                   | \$212.41                        | 59,483                   | \$3,571                          |
| Relative decrease in durability of protection | 360,781       | 44,943                   | \$1,096.24                      | 29,413                   | \$37,270                         |
| Optimistic combination <sup>a</sup>           | 1,060,695     | 98,451                   | \$38.22                         | 65,500                   | \$583                            |
| Pessimistic combination <sup>a</sup>          | 321,052       | 39,329                   | \$1,202.39                      | 25,771                   | \$46,656                         |
| <b>Vaccine coverage scenarios:</b>            |               |                          |                                 |                          |                                  |
| Optimistic increase in coverage               | 752,538       | 100,407                  | \$1,000.39                      | 64,178                   | \$15,588                         |
| Pessimistic increase in coverage              | 250,846       | 33,469                   | \$380.79                        | 21,393                   | \$17,800                         |

| Summary results                          | Cases avoided | Hospitalizations avoided | Incremental direct costs (\$MM) | Incremental QALYs gained | Incremental cost per QALY gained |
|------------------------------------------|---------------|--------------------------|---------------------------------|--------------------------|----------------------------------|
| <b>Additional scenarios of interest:</b> |               |                          |                                 |                          |                                  |
| CDC vaccine price [6]                    | 501,692       | 66,938                   | -\$251.51                       | 42,785                   | Cost saving                      |
| Increased incidence [7]                  | 1,304,339     | 181,623                  | -\$1,474.60                     | 116,801                  | Cost saving                      |
| Clinical trial efficacy [8]              | 800,418       | 92,070                   | \$187.45                        | 60,533                   | \$3,097                          |

<sup>a</sup> Vaccine attribute combinations include efficacy and waning parameter changes (e.g., optimistic = higher relative effectiveness and decrease in waning rate).

## References

1. Centers for Disease Control and Prevention. Weekly United States COVID-19 cases and deaths by state. 12 September 2023. <https://data.cdc.gov/Case-Surveillance/Weekly-United-States-COVID-19-Cases-and-Deaths-by-/pwn4-m3yp>. Accessed 6 October 2023.
2. Montoy JCC. Prevalence of symptoms  $\leq$  12 months after acute illness, by COVID-19 testing status among adults—United States, December 2020–March 2023. *MMWR Morb Mortal Wkly Rep*. 2023;72.
3. US Food and Drug Administration. Recommendation for the 2023-2024 formula of COVID-19. 2023. <https://www.fda.gov/media/169591/download>. Accessed 6 October 2023.
4. Menegale F, Manica M, Zardini A, Guzzetta G, Marziano V, d'Andrea V, et al. Evaluation of waning of SARS-CoV-2 vaccine-induced immunity: a systematic review and meta-analysis. *JAMA Netw Open*. 2023;6(5):e2310650-e.
5. Wu N, Joyal-Desmarais K, Ribeiro PA, Vieira AM, Stojanovic J, Sanuade C, et al. Long-term effectiveness of COVID-19 vaccines against infections, hospitalisations, and mortality in adults: findings from a rapid living systematic evidence synthesis and meta-analysis up to December, 2022. *Lancet Respir Med*. 2023;11(5):439-52.
6. Centers for Disease Control and Prevention. Adult COVID-19 vaccine price list. 2023. <https://www.cdc.gov/vaccines/programs/vfc/awardees/vaccine-management/price-list/index.html>. Accessed 22 September 2023.
7. Prosser L. Economic analysis of COVID-19 vaccination. Presented at Meeting of the Advisory Committee on Immunization Practices, Centers for Disease Control and Prevention; 12 September 2023. Atlanta, GA. <https://www.cdc.gov/vaccines/acip/meetings/downloads/slides-2023-09-12/06-COVID-Prosser-508.pdf>. Accessed 6 October 2023.
8. Dunkle LM, Kotloff KL, Gay CL, Áñez G, Adelglass JM, Barrat Hernández AQ, et al. Efficacy and safety of NVX-CoV2373 in adults in the United States and Mexico. *N Engl J Med*. 2022 Feb;386(6):531-43. doi:<http://dx.doi.org/10.1056/NEJMoa2116185>.
